# Supplementary material
Source: publisher figshare collection journal article supplement (https://geolsoc.figshare.com/ndownloader/files/36478141)
Supplement: Supplementary file 1 [file 36478141]

## Sheet: Tabelle1
Supplementary Table 3: O- and Hf-isotopic results by SIMS and MC LA ICP MS
Analysis ID	δ18O SMOW	1 s.e.	1 s.e.	1 s.e.	I 18	176Yb/177Hf a	±2s	176Lu/177Hf a	±2s	178Hf/177Hf	SigHf b	176Hf/177Hf	±2s c	176Hf/177Hf(t)d	εHf(t) d	±2s c	TNC e	age f	±2s	Comment
	‰	‰	‰	‰	cps						(V)						(Ga)	(Ma)
Session 23.Sept 2021		int	ext	used
Zrm_Ne1_@2	4.48932	0.109365	0.0976864	0.109365	3945040	0.0249651	20.3844	0.00102191	6.48447	1.46717	8.11241	0.282713	27.1133	0.282713	-2.55612	0.958797	1.03222	0.1	0	LS
Zrm_Ne1_@4	4.29477	0.0784167	0.0976864	0.0976864	3956730	0.0411039	33.9214	0.00169497	10.5365	1.46718	10.0158	0.282934	22.1598	0.282933	6.17552	0.783702	0.586237	42.35	0.752	HE
Zrm_Ne1_@6	4.64894	0.0976708	0.0976864	0.0976864	3938320	0.0170956	38.4662	0.000675279	14.0995	1.46719	8.981	0.282708	26.0762	0.282708	-2.71287	0.92212	1.04082	0.1	0	LS
Zrm_Ne1_@7	4.34466	0.099184	0.0976864	0.099184	3981030	0.0178155	16.2792	0.000757014	5.43177	1.46718	8.35825	0.282926	23.7464	0.282926	5.91989	0.839814	0.600311	42.27	0.853	HE
Zrm_Ne1_@9	4.67388	0.092826	0.0976864	0.0976864	3995890	0.372893	301.844	0.00868542	53.5314	1.46716	7.37515	0.282848	42.7431	0.282848	2.23759	1.5115	0.768765	0.1	0	LS
Zrm_Ne1_@11	4.7088	0.0775439	0.0976864	0.0976864	4014940	0.123674	106.285	0.0042809	28.5969	1.46717	8.60626	0.282719	22.4422	0.282719	-2.3251	0.793615	1.01956	0.1	0	LS
Zrm_Ne1_@14	5.03303	0.137998	0.0976864	0.137998	4012640	0.0465699	39.5825	0.00161121	10.5124	1.4672	10.4125	0.282829	22.1364	0.282828	2.44131	0.782871	0.792124	41.99	1.22	HE
Zrm_Ne1_@15	4.47435	0.0984258	0.0976864	0.0984258	4059050	0.187634	150.909	0.00630998	38.4681	1.46716	7.10728	0.282698	46.5667	0.282698	-3.06137	1.64672	1.05992	0.1	0	LS
Zrm_Ne1_@17	4.99812	0.0878078	0.0976864	0.0976864	3957660	0.0944476	96.8646	0.00341056	26.5315	1.46719	7.54278	0.282731	23.5719	0.282731	-1.89715	0.833562	0.996084	0.1	0	LS
Zrm_Ne1_@20	4.26484	0.0929249	0.0976864	0.0976864	4061030	0.528761	425.324	0.0105917	65.6171	1.46718	8.08957	0.282802	56.4813	0.282802	0.613648	1.99732	0.858161	0.1	0	LS
Zrm_Ne1_@22	4.90334	0.105315	0.0976864	0.105315	4083220	0.217297	228.152	0.00495831	45.6215	1.46715	7.8595	0.282776	28.4381	0.282776	-0.316263	1.00564	0.909284	0.1	0	LS
Zrm_Ne1_@23	4.26484	0.0982337	0.0976864	0.0982337	4112080	0.574898	461.478	0.011304	69.5386	1.4672	12.2417	0.283045	54.9785	0.283045	9.20244	1.94418	0.383657	0.1	0	LS
Zrm_Ne1_@25	4.04536	0.105878	0.0976864	0.105878	4117430	0.575148	461.575	0.0116948	71.8082	1.4672	12.2654	0.28306	57.3127	0.28306	9.71282	2.02672	0.355328	0.1	0	LS
Zrm_Ne1_@27	5.29741	0.135057	0.0976864	0.135057	4124940	0.406746	334.17	0.00886465	56.8515	1.46719	7.17593	0.282861	39.107	0.282861	2.68358	1.38293	0.744187	0.1	0	LS
Zrm_Ne1_@29	4.90334	0.155597	0.0976864	0.155597	4125740	0.141899	136.766	0.00451386	35.9843	1.46716	10.9404	0.282769	40.0259	0.282769	-0.548155	1.41542	0.922025	0.1	0	LS
Zrm_Ne1_@31	5.28245	0.0836178	0.0976864	0.0976864	4110840	0.0107378	13.2819	0.000428941	4.4205	1.46717	10.7249	0.282733	20.5468	0.282733	-1.84792	0.726586	0.993383	0.1	0	LS
Zrm_Ne1_@33	5.22259	0.0963284	0.0976864	0.0976864	4126860	0.0261636	23.3734	0.0011102	8.13659	1.46718	11.1688	0.282924	20.7379	0.282924	5.81943	0.733412	0.605124	41.37	0.582	HE
Zrm_Ne1_@35	5.52687	0.0926327	0.0976864	0.0976864	4150780	0.0214479	17.2846	0.000889736	5.4039	1.46719	8.02973	0.282704	26.4466	0.282704	-2.85561	0.93522	1.04864	0.1	0	LS
Zrm_Ne1_@37	5.10287	0.10429	0.0976864	0.10429	4187540	0.211532	273.812	0.00467237	54.1187	1.46722	6.48419	0.282694	29.1517	0.282694	-3.22652	1.03088	1.06897	0.1	0	LS
Zrm_Ne1_@39	5.1328	0.0752377	0.0976864	0.0976864	4165170	0.189661	181.523	0.00688889	54.9457	1.46715	7.16837	0.282785	27.7577	0.282785	-0.00745083	0.981582	0.892312	0.1	0	LS
Zrm_Ne1_@41	4.99812	0.0883558	0.0976864	0.0976864	4146420	0.109498	89.3811	0.00389364	24.598	1.4672	7.62582	0.282795	28.5681	0.282795	0.369215	1.01024	0.871604	0.1	0	LS
Zrm_Ne1_@43	4.22255	0.104833	0.0976864	0.104833	4088090	0.0192258	16.4455	0.000502533	3.25424	1.46721	6.57417	0.282737	28.0015	0.282737	-1.70369	0.990205	0.98547	0.1	0	LS
Zrm_Ne1_@45	4.96573	0.0969591	0.0976864	0.0976864	4126800	0.0671033	76.5219	0.00259712	25.5959	1.46718	6.46545	0.282764	27.3642	0.282764	-0.732454	0.967669	0.932149	0.1	0	LS
Zrm_Ne1_@47	4.70137	0.0875154	0.0976864	0.0976864	4116360	0.0815323	65.2669	0.00321387	19.3222	1.46716	9.97243	0.282655	22.2958	0.282652	-3.7487	0.788512	1.13309	43.11	0.577	HE
Zrm_Ne1_@49	4.88093	0.0790959	0.0976864	0.0976864	4076220	0.117161	153.952	0.00420297	49.0285	1.46723	7.70624	0.282747	35.5789	0.282747	-1.35238	1.25816	0.966189	0.1	0	LS
Zrm_Ne1_@53	4.59164	0.0838841	0.0976864	0.0976864	4050480	0.0664745	56.7959	0.00250607	16.4	1.46724	10.0763	0.28291	23.1391	0.282908	5.29927	0.818334	0.634682	42.34	0.587	HE
Zrm_Ne1_@56	5.07546	0.129863	0.0976864	0.129863	4060850	0.013759	12.5733	0.000569177	4.13611	1.46719	9.26246	0.282738	19.5146	0.282738	-1.66677	0.690085	0.983444	0.1	0	LS
Zrm_Ne1_@58	4.91585	0.115663	0.0976864	0.115663	4039740	0.0788837	64.614	0.00305829	18.7347	1.46715	7.7672	0.282758	21.3904	0.282758	-0.961144	0.75642	0.944709	0.1	0	LS
Zrm_Ne1_@59	4.09785	0.131248	0.0976864	0.131248	3996850	0.0471098	37.762	0.00181684	10.9632	1.46715	8.92627	0.282926	23.0281	0.282924	5.79157	0.814404	0.604791	39.1	1.08	HE
Zrm_Ne1_@61	4.56172	0.0671595	0.0976864	0.0976864	4003330	0.0637123	54.0993	0.00258777	16.955	1.46713	8.21419	0.282889	24.7311	0.282887	4.57725	0.874638	0.675548	43.52	0.696	HE
Zrm_Ne1_@64	5.05052	0.128918	0.0976864	0.128918	3957360	0.0468506	40.6129	0.0016552	11.266	1.46723	7.82206	0.28285	23.7196	0.282849	3.20619	0.838864	0.7505	42.65	0.943	HE
Zrm_Ne1_@66	4.54176	0.106017	0.0976864	0.106017	3962320	0.0546402	43.777	0.00209652	12.6821	1.46711	7.33941	0.282924	23.7206	0.282923	5.8354	0.838901	0.606023	43.53	1.51	HE
Zrm_Ne1_@67	4.50186	0.0926353	0.0976864	0.0976864	3927340	0.26955	245.465	0.00610221	43.074	1.46716	8.56467	0.282773	30.0022	0.282773	-0.432451	1.06095	0.915668	0.1	0	LS
Zrm_Ne1_@69	4.35223	0.107644	0.0976864	0.107644	3957000	0.24071	194.281	0.00491647	29.9254	1.46723	9.47982	0.282764	24.7047	0.282764	-0.72695	0.873621	0.931847	0.1	0	LS
Zrm_Ne1_@74	4.60162	0.120914	0.0976864	0.120914	4004770	0.031944	46.8355	0.0012023	15.9313	1.46721	5.32373	0.282724	28.7538	0.282724	-2.14379	1.01681	1.00961	0.1	0	LS
Zrm_Ne1_@75	4.66646	0.133242	0.0976864	0.133242	4031460	0.356862	292.389	0.00778458	49.6327	1.46723	6.86018	0.282766	41.5565	0.282766	-0.670067	1.46954	0.928722	0.1	0	LS
Zrm_Ne1_@76	4.83604	0.0668076	0.0976864	0.0976864	4045630	0.0696574	64.7648	0.00174832	12.6265	1.46723	7.68855	0.282752	22.6554	0.282752	-1.15944	0.801154	0.955597	0.1	0	LS
Zrm_Ne1_@77	4.22753	0.106106	0.0976864	0.106106	4060860	0.495557	399.437	0.0102128	63.2545	1.46717	8.15271	0.282846	42.5298	0.282846	2.15143	1.50396	0.773511	0.1	0	LS
Zrm_Ne1_@79	4.83604	0.106123	0.0976864	0.106123	4062030	0.0917616	126.379	0.00317197	38.8936	1.46717	6.54003	0.28276	25.7575	0.28276	-0.865537	0.910853	0.939458	0.1	0	LS
Zrm_Ne1_@82	4.9358	0.12268	0.0976864	0.12268	4091790	0.160592	167.463	0.00353885	29.7883	1.46716	7.45453	0.282758	30.2271	0.282758	-0.953126	1.06891	0.944269	0.1	0	LS
Zrm_Ne1_@83	4.80113	0.0755714	0.0976864	0.0976864	4076670	0.200174	161.723	0.00700557	43.4419	1.46726	6.40922	0.282749	41.5019	0.282749	-1.26537	1.46761	0.961413	0.1	0	LS
Zrm_Ne1_@85	4.45753	0.104198	0.0976864	0.104198	4072300	0.0886004	72.5387	0.00345686	21.4282	1.46714	6.86761	0.282767	26.9121	0.282767	-0.637061	0.951679	0.926909	0.1	0	LS
Zrm_Ne1_@86	4.41763	0.123718	0.0976864	0.123718	4062910	0.0818741	68.1269	0.00246288	15.9512	1.46719	9.97197	0.282729	17.2192	0.282729	-1.96889	0.608915	1.00002	0.1	0	LS
Zrm_Ne1_@87	5.42506	0.119863	0.0976864	0.119863	4108590	0.30998	248.708	0.00628029	37.8679	1.46723	9.36441	0.282841	28.8808	0.282841	1.96923	1.0213	0.783548	0.1	0	LS
Zrm_Ne1_@88	4.8615	0.10234	0.0976864	0.10234	4094410	0.0327749	26.2633	0.00135936	8.16513	1.46719	7.63643	0.282704	21.3878	0.282704	-2.84804	0.756327	1.04823	0.1	0	LS
Zrm_Ne1_@89	4.72685	0.111315	0.0976864	0.111315	4128140	0.950551	763.307	0.0198828	119.363	1.46714	7.67347	0.282734	98.19	0.282734	-1.8174	3.47225	0.991709	0.1	0	LS
Zrm_Ne1_@90	5.10588	0.106113	0.0976864	0.106113	4119730	0.343341	285.533	0.00763538	48.8705	1.46715	6.89751	0.282822	40.2121	0.282822	1.32767	1.422	0.818873	0.1	0	LS
Zrm_Ne1_@91	5.5298	0.0660721	0.0976864	0.0976864	4136280	0.202118	226.267	0.00682086	65.5505	1.46718	5.17224	0.282713	52.9662	0.282713	-2.53991	1.87302	1.03134	0.1	0	LS
Zrm_Ne1_@93	4.8216	0.0998035	0.0976864	0.0998035	4114610	0.0653795	52.3143	0.00246887	14.8489	1.46717	7.43319	0.282739	26.8812	0.282739	-1.62472	0.950589	0.981136	0.1	0	LS
Zrm_Ne1_@96	4.51738	0.117147	0.0976864	0.117147	4106220	0.0275145	23.5715	0.00107745	7.17468	1.46714	6.60501	0.28273	25.191	0.28273	-1.95316	0.890817	0.999157	0.1	0	LS
Zrm_Ne1_@97	3.53987	0.0827487	0.0976864	0.0976864	4063520	0.655933	526.622	0.0134861	80.9241	1.46712	8.13932	0.282977	62.6078	0.282977	6.80257	2.21397	0.516666	0.1	0	LS
Zrm_Ne1_@98	3.77926	0.0885595	0.0976864	0.0976864	4013190	0.400805	320.763	0.00784217	47.5394	1.46713	10.0236	0.282913	53.902	0.282913	4.54231	1.90611	0.641636	0.1	0	LS
Zrm_Ne1_@99	4.23809	0.0999821	0.0976864	0.0999821	4014910	0.132967	193.755	0.00434544	55.9169	1.46729	6.00366	0.282732	60.9	0.282732	-1.85967	2.15358	0.994028	0.1	0	LS
Zrm_Ne1_@100	3.94384	0.107376	0.0976864	0.107376	4009400	0.655821	729.731	0.0124625	113.579	1.4671	19.3116	0.282634	39.744	0.282634	-5.34313	1.40545	1.1848	0.1	0	LS
Zrm_Ne1_@101	4.71188	0.083165	0.0976864	0.0976864	4003680	0.0393138	42.0139	0.00147412	13.9195	1.46724	6.60514	0.282736	30.0104	0.282736	-1.73578	1.06125	0.98723	0.1	0	LS
Zrm_Ne1_@103	4.93132	0.0812967	0.0976864	0.0976864	3960810	0.0917041	73.3721	0.00326367	19.6538	1.4672	6.65822	0.282773	20.7831	0.282773	-0.413794	0.734945	0.914643	0.1	0	LS
Zrm_Ne1_@108	5.08094	0.158517	0.0976864	0.158517	3954160	0.0236602	18.9702	0.000928322	5.57204	1.4672	6.79333	0.282747	24.7665	0.282747	-1.35021	0.875807	0.96607	0.1	0	LS
Zrm_Ne1_@109	5.55473	0.0662456	0.0976864	0.0976864	3931900	0.0311367	25.4202	0.00116374	7.25463	1.4672	8.1167	0.282741	20.9343	0.282741	-1.55179	0.740292	0.977134	0.1	0	LS
Zrm_Ne2_@1	4.61214	0.116777	0.0976864	0.116777	3929690	0.0227665	35.8653	0.000893155	13.2636	1.46717	6.98984	0.282731	26.9355	0.282731	-1.91936	0.952508	0.997302	0.1	0	LS
Zrm_Ne2_@2	4.7069	0.0973508	0.0976864	0.0976864	3953210	0.407911	401.105	0.00862564	69.0388	1.46716	15.6647	0.282622	53.5507	0.282622	-5.75722	1.89369	1.20744	0.1	0	LS
Zrm_Ne2_@4	4.84654	0.097433	0.0976864	0.0976864	3974600	0.0747961	65.707	0.00272535	17.9553	1.46718	10.2033	0.282725	27.3698	0.282725	-2.10751	0.967865	1.00762	0.1	0	LS
Zrm_Ne2_@5	4.41421	0.0935593	0.0976864	0.0976864	3942420	0.0207263	16.6485	0.000803552	4.82538	1.46718	6.86503	0.282743	25.0434	0.282743	-1.4826	0.885598	0.973337	0.1	0	LS
Zrm_Ne2_@6	4.68351	0.117484	0.0976864	0.117484	3974290	0.034066	40.8027	0.00137964	13.9527	1.46715	6.79052	0.282725	20.4614	0.282725	-2.13375	0.723568	1.00906	0.1	0	LS
Zrm_Ne2_@7	4.51894	0.149168	0.0976864	0.149168	3983610	0.173167	139.785	0.00577718	34.7604	1.46723	6.42211	0.282706	50.3387	0.282706	-2.78963	1.78011	1.04502	0.1	0	LS
Zrm_Ne2_@8	4.79322	0.0884065	0.0976864	0.0976864	3961000	0.027217	36.2754	0.000945275	11.1305	1.46709	7.88284	0.282728	23.3206	0.282728	-2.0279	0.824676	1.00326	0.1	0	LS
Zrm_Ne2_@9	4.84309	0.0883639	0.0976864	0.0976864	3996320	0.111694	94.2907	0.00405496	25.9952	1.4672	5.95572	0.282781	32.1758	0.282781	-0.123509	1.13782	0.898691	0.1	0	LS
Zrm_Ne2_@10	4.92288	0.151489	0.0976864	0.151489	3996490	0.171866	155.161	0.00560954	39.9305	1.4672	6.43993	0.282809	52.5982	0.282809	0.83984	1.86001	0.845718	0.1	0	LS
Zrm_Ne2_@11	4.6486	0.114629	0.0976864	0.114629	4002410	0.24668	219.194	0.00551081	39.5586	1.46716	7.27329	0.282739	24.7364	0.282739	-1.63399	0.874742	0.981645	0.1	0	LS
Zrm_Ne2_@13	5.28693	0.107937	0.0976864	0.107937	4000310	0.0336539	27.1527	0.00120477	7.24633	1.46725	7.46693	0.282753	18.4258	0.282753	-1.12133	0.651582	0.953505	0.1	0	LS
Zrm_Ne2_@14	5.00766	0.108197	0.0976864	0.108197	4015880	0.055116	46.2437	0.00188461	12.2582	1.46718	7.5749	0.282921	21.7683	0.282919	5.65457	0.769851	0.613968	41.04	0.966	HE
Zrm_Ne2_@16	5.08247	0.10538	0.0976864	0.10538	4034270	0.0245386	25.3615	0.000945635	7.82502	1.4672	6.76846	0.282739	25.9514	0.282739	-1.61913	0.917709	0.98083	0.1	0	LS
Zrm_Ne2_@17	5.11239	0.101439	0.0976864	0.101439	4036890	0.0337599	27.0113	0.00131947	7.92927	1.46716	7.12193	0.282722	21.641	0.282722	-2.23939	0.765282	1.01486	0.1	0	LS
Zrm_Ne2_@18	5.17223	0.112717	0.0976864	0.112717	4039700	0.00628671	6.74716	0.000245502	2.20262	1.4672	9.92975	0.282724	17.5338	0.282724	-2.16423	0.620039	1.01073	0.1	0	LS
Zrm_Ne2_@19	4.96278	0.121338	0.0976864	0.121338	4061620	0.420968	337.051	0.00953708	57.3113	1.46721	7.05311	0.282826	43.6978	0.282826	1.4635	1.54526	0.811396	0.1	0	LS
Zrm_Ne2_@21	n.d.	n.d.	n.d.	n.d.	n.d.	n.d.	n.d.	n.d.	n.d.	n.d.	n.d.	n.d.	n.d.	n.d.	n.d.	n.d.	n.d.	0.1	0	LS
Zrm_Ne2_@22	5.38667	0.0860507	0.0976864	0.0976864	4082220	0.0439795	41.3241	0.00163784	11.6179	1.46723	6.07831	0.282727	28.1774	0.282727	-2.03414	0.996423	1.0036	0.1	0	LS
Zrm_Ne2_@23	5.54127	0.0834878	0.0976864	0.0976864	4068030	0.173944	265.713	0.00568275	79.1088	1.46718	6.95524	0.282751	23.5774	0.282751	-1.18396	0.833757	0.956943	0.1	0	LS
Zrm_Ne2_@24	4.90293	0.10012	0.0976864	0.10012	4059850	0.0291327	31.5002	0.000831825	7.61576	1.46721	11.1487	0.282677	18.4866	0.282677	-3.83394	0.653735	1.10223	0.1	0	LS
Zrm_Ne2_@25	5.50636	0.120457	0.0976864	0.120457	4102690	0.105262	86.8426	0.00355353	22.8883	1.46715	8.24676	0.282749	21.9779	0.282749	-1.26942	0.777195	0.961635	0.1	0	LS
Zrm_Ne2_@26	5.02262	0.109585	0.0976864	0.109585	4093920	0.0261552	35.3703	0.00105353	12.111	1.46714	5.80801	0.282713	28.9036	0.282713	-2.53917	1.02211	1.03129	0.1	0	LS
Zrm_Ne2_@27	5.12236	0.0978248	0.0976864	0.0978248	4082080	0.0325127	36.6874	0.00125673	12.8279	1.46713	6.00458	0.282773	26.2655	0.282773	-0.424159	0.928814	0.915213	0.1	0	LS
Zrm_Ne2_@28	5.91194	0.0853029	0.0976864	0.0976864	4046610	0.0642695	56.2092	0.00224217	14.8117	1.46713	7.26196	0.282751	24.7167	0.282751	-1.19796	0.874047	0.957712	0.1	0	LS
Zrm_Ne2_@30	5.47308	0.0975166	0.0976864	0.0976864	4059140	0.0468383	97.8079	0.00169845	33.0223	1.46714	8.38601	0.28272	25.8622	0.28272	-2.30434	0.914554	1.01842	0.1	0	LS
Zrm_Ne2_@31	4.85469	0.0970674	0.0976864	0.0976864	4060000	0.119047	95.7252	0.00381976	23.483	1.46722	8.591	0.282737	25.8062	0.282737	-1.70795	0.912574	0.985703	0.1	0	LS
Zrm_Ne2_@32	6.07651	0.115954	0.0976864	0.115954	4055470	0.0358625	67.4607	0.00122833	20.8512	1.46713	6.71212	0.282724	15.2744	0.282724	-2.16258	0.540142	1.01064	0.1	0	LS
Zrm_Ne2_@33	5.21875	0.0787644	0.0976864	0.0976864	4048290	0.0862871	148.991	0.00299119	46.7934	1.46709	6.42328	0.28274	34.639	0.28274	-1.57682	1.22492	0.978507	0.1	0	LS
Zrm_Ne2_@34	5.81719	0.0897747	0.0976864	0.0976864	4049510	0.17504	143.106	0.00587274	35.8757	1.46717	5.90123	0.282775	33.8253	0.282775	-0.364046	1.19615	0.91191	0.1	0	LS
Zrm_Ne2_@35	5.38332	0.114983	0.0976864	0.114983	4023760	0.0399566	40.2665	0.00143542	11.7012	1.46715	7.10053	0.282694	21.3869	0.282694	-3.20899	0.756297	1.06801	0.1	0	LS
Zrm_Ne2_@36	5.11901	0.110529	0.0976864	0.110529	4021360	0.198139	194.254	0.00703995	51.3475	1.46714	6.35676	0.282777	27.661	0.282777	-0.282439	0.978163	0.907426	0.1	0	LS
Zrm_Ne2_@37	5.57781	0.108284	0.0976864	0.108284	3999960	0.0488878	39.2247	0.00174072	10.4635	1.46719	7.01172	0.282718	25.9354	0.282718	-2.37969	0.917143	1.02255	0.1	0	LS
Zrm_Ne2_@40	5.25366	0.135708	0.0976864	0.135708	3970180	0.0880379	99.6583	0.00309334	33.4174	1.46716	6.00086	0.282735	25.2862	0.282735	-1.76696	0.894185	0.988941	0.1	0	LS
Zrm_Ne2_@41	5.5429	0.0780744	0.0976864	0.0976864	3960130	0.0610696	53.3639	0.0022093	15.9534	1.46716	7.86497	0.282764	23.1468	0.282764	-0.741974	0.818531	0.932672	0.1	0	LS
Zrm_Ne2_@42	4.24129	0.114567	0.0976864	0.114567	3936160	0.214973	172.336	0.00633455	38.0968	1.46697	3.4181	0.282862	55.4554	0.282861	2.70711	1.96105	0.74289	0.1	0	LS
Zrm_Ne2_@43	4.94945	0.125478	0.0976864	0.125478	3949190	0.170042	166.426	0.00671537	52.6749	1.46711	5.76867	0.282893	46.4961	0.282893	3.83248	1.64422	0.680822	0.1	0	LS
Zrm_Ne2_@44	4.18643	0.116257	0.0976864	0.116257	3935360	0.0145121	11.6235	0.000416368	2.50022	1.46713	5.78874	0.282768	24.8806	0.282768	-0.60277	0.879843	0.925026	0.1	0	LS
Zrm_Ne2_@45	4.62529	0.11457	0.0976864	0.11457	3938170	0.589987	472.698	0.012835	78.1033	1.46714	7.30497	0.282724	57.4525	0.282724	-2.14341	2.03167	1.00959	0.1	0	LS
Zrm_Ne2_@46	4.34103	0.0791306	0.0976864	0.0976864	3901360	0.42642	414.709	0.00864267	68.2678	1.46719	8.63162	0.28295	37.316	0.28295	5.84506	1.31959	0.569642	0.1	0	LS
Zrm_Ne2_@47	4.56545	0.0917512	0.0976864	0.0976864	3874390	0.397103	383.147	0.00864686	65.8909	1.46719	6.07637	0.282893	50.3409	0.282893	3.81915	1.78018	0.681558	0.1	0	LS
Zrm_Ne2_@48	4.61532	0.0797117	0.0976864	0.0976864	3843480	0.0584837	47.1391	0.00219316	13.4889	1.46715	6.16374	0.282787	27.9875	0.282787	0.0699555	0.989711	0.888057	0.1	0	LS
Zrm_Ne2_@53	5.25366	0.113082	0.0976864	0.113082	3950130	0.0289669	23.6987	0.00109471	6.69705	1.4672	6.45873	0.282745	25.9801	0.282745	-1.39649	0.918723	0.96861	0.1	0	LS
Zrm_Ne2_@54	5.10404	0.0978074	0.0976864	0.0978074	3963800	0.163393	130.854	0.00580434	34.8977	1.46717	6.56605	0.282726	36.455	0.282726	-2.0697	1.28914	1.00555	0.1	0	LS
Zrm_Ne2_@55	4.63028	0.0884983	0.0976864	0.0976864	3990450	0.103459	164.844	0.00330494	48.2185	1.46708	6.47113	0.282745	30.7063	0.282745	-1.39839	1.08585	0.968714	0.1	0	LS
Zrm_Ne2_@58	5.21916	0.134506	0.0976864	0.134506	3999820	0.0361079	30.4613	0.00136745	9.23288	1.46716	6.55159	0.282728	24.2341	0.282728	-2.00705	0.856979	1.00211	0.1	0	LS
Zrm_Ne2_@59	5.11445	0.105353	0.0976864	0.105353	3998120	0.00959424	7.72086	0.000409317	2.48062	1.46712	8.05732	0.282721	26.2286	0.282721	-2.27586	0.927511	1.01686	0.1	0	LS
Zrm_Ne2_@60	5.78758	0.148559	0.0976864	0.148559	4005690	0.184902	173.534	0.00436035	35.2779	1.46718	8.04317	0.282791	33.0865	0.282791	0.23128	1.17002	0.879188	0.1	0	LS
Zrm_Ne2_@61	5.06459	0.102394	0.0976864	0.102394	4004530	0.0906907	111.565	0.00320154	33.7143	1.46712	5.63376	0.282734	28.4566	0.282734	-1.78403	1.0063	0.989878	0.1	0	LS
Zrm_Ne2_@67	5.37373	0.094191	0.0976864	0.0976864	4044770	0.0153178	14.3471	0.000580974	4.43005	1.46715	6.65257	0.282743	23.4965	0.282743	-1.49987	0.830896	0.974285	0.1	0	LS
Zrm_Ne2_@68	5.72774	0.13463	0.0976864	0.13463	4036280	0.0272075	21.897	0.00101889	6.18018	1.46715	6.68235	0.282717	26.5112	0.282717	-2.39527	0.937504	1.0234	0.1	0	LS
Zrm_Ne2_@69	5.97206	0.106732	0.0976864	0.106732	3983000	0.0323732	27.26	0.0010801	7.24116	1.46717	9.62631	0.282678	17.2668	0.282678	-3.76432	0.610598	1.09842	0.1	0	LS
Zrm_Ne2_@71	5.46348	0.119263	0.0976864	0.119263	3963220	0.0354338	29.5437	0.00137166	8.98951	1.46715	6.27526	0.282735	24.5626	0.282735	-1.76113	0.868596	0.988621	0.1	0	LS
Zrm_Ne2_@72	5.30891	0.113099	0.0976864	0.113099	3959440	0.0437271	44.5664	0.00149269	12.7014	1.46713	8.68331	0.282731	16.0769	0.282731	-1.92328	0.568519	0.997518	0.1	0	LS
Zrm_Ne2_@74	4.47622	0.110116	0.0976864	0.110116	3921510	0.152877	124.147	0.00502508	30.536	1.46713	6.23859	0.282776	28.5986	0.282776	-0.301555	1.01132	0.908476	0.1	0	LS
Zrm_Ne2_@75	4.86016	0.0896393	0.0976864	0.0976864	3922660	0.0225388	18.242	0.000896159	5.4512	1.46716	9.46007	0.282925	20.2774	0.282924	5.89824	0.71713	0.602539	43.52	0.661	HE
Zrm_Ne2_@76	5.11944	0.0899084	0.0976864	0.0976864	3897500	0.0727292	59.3755	0.00254983	16.0911	1.46716	8.27784	0.282725	21.2836	0.282725	-2.11264	0.752642	1.0079	0.1	0	LS
Zrm_Ne2_@77	4.12719	0.120826	0.0976864	0.120826	3860060	0.0633466	51.4545	0.00238457	14.4518	1.46713	8.23431	0.282964	21.6021	0.282962	7.1904	0.763977	0.530112	42.41	0.574	HE
Zrm_Ne2_@79	4.47124	0.133959	0.0976864	0.133959	3835900	0.0440309	40.1676	0.00175026	12.6081	1.46708	8.95079	0.282759	26.1156	0.282759	-0.934708	0.923516	0.943257	0.1	0	LS
Zrm_Ne2_@80	n.d.	n.d.	n.d.	n.d.	n.d.	n.d.	n.d.	n.d.	n.d.	n.d.	n.d.	n.d.	n.d.	n.d.	n.d.	n.d.	n.d.	0.1	0	LS
Zrm_Ni_@4	5.65295	0.0983361	0.0976864	0.0983361	3909400	0.0912998	73.1347	0.00277853	16.6793	1.46713	10.8016	0.282748	21.7398	0.282748	-1.29082	0.768774	0.96281	0.1	0	LS
Zrm_Ni_@5	4.75046	0.0799627	0.0976864	0.0976864	3914780	0.0749628	82.4559	0.00290075	26.5672	1.4671	7.06273	0.282942	27.1204	0.282942	5.55981	0.959046	0.585415	0.1	0	LS
Zrm_Ni_@6	4.91002	0.1304	0.0976864	0.1304	3917090	0.111053	124.39	0.0037103	35.0421	1.46724	7.02423	0.282721	28.0472	0.282721	-2.26899	0.99182	1.01648	0.1	0	LS
Zrm_Ni_@7	4.89506	0.100599	0.0976864	0.100599	3923290	0.0567275	103.731	0.00195238	34.4432	1.46709	7.99619	0.282705	21.9177	0.282705	-2.82823	0.775066	1.04714	0.1	0	LS
Zrm_Ni_@8	5.11445	0.114001	0.0976864	0.114001	3929240	0.134931	115.612	0.00473083	33.1416	1.46711	9.36729	0.282693	24.5389	0.282693	-3.26003	0.867759	1.0708	0.1	0	LS
Zrm_Ni_@9	5.08952	0.131685	0.0976864	0.131685	3922020	0.0512229	42.0014	0.00207923	12.6915	1.46711	7.99894	0.282746	26.0539	0.282746	-1.36646	0.921334	0.966962	0.1	0	LS
Zrm_Ni_@10	n.d.	n.d.	n.d.	n.d.	n.d.	n.d.	n.d.	n.d.	n.d.	n.d.	n.d.	n.d.	n.d.	n.d.	n.d.	n.d.	n.d.	0.1	0	LS
Zrm_Ni_@11	5.01608	0.0860948	0.0976864	0.0976864	4049030	0.0359126	70.1643	0.00127917	22.9732	1.46715	10.7041	0.282738	22.079	0.282738	-1.65317	0.78077	0.982697	0.1	0	LS
Zrm_Ni_@12	4.13333	0.112703	0.0976864	0.112703	4030920	0.0081507	11.4836	0.000307855	3.68719	1.46711	8.93616	0.282988	23.9897	0.282987	8.19455	0.848424	0.477982	46.66	0.64	HE
Zrm_Ni_@13	5.32031	0.122139	0.0976864	0.122139	4043490	0.0366851	82.5584	0.00136384	26.4615	1.46716	7.96474	0.282881	29.3908	0.28288	4.28723	1.03943	0.6903	41.99	0.617	HE
Zrm_Ni_@14	5.25049	0.114976	0.0976864	0.114976	4052500	0.0637061	69.6587	0.00243432	23.7774	1.46712	8.62437	0.282736	24.7935	0.282736	-1.7231	0.876761	0.986535	0.1	0	LS
Zrm_Ni_@15	5.34525	0.0961961	0.0976864	0.0976864	4066410	0.0159872	28.0555	0.000562761	7.90414	1.46715	9.93142	0.282763	21.0599	0.282763	-0.77361	0.744731	0.93441	0.1	0	LS
Zrm_Ni_@16	5.62952	0.117539	0.0976864	0.117539	4041410	0.0316263	27.0591	0.0012869	8.42093	1.46713	12.2569	0.282878	21.4095	0.282877	4.20002	0.757168	0.69571	42.71	0.673	HE
Zrm_Ni_@17	5.28041	0.0910938	0.0976864	0.0976864	4088660	0.0741711	59.9084	0.00293737	18.1012	1.46716	7.57861	0.282798	27.1122	0.282798	0.475658	0.958756	0.86575	0.1	0	LS
Zrm_Ni_@18	5.21059	0.0808017	0.0976864	0.0976864	4067960	0.0323489	26.7302	0.00125383	8.15436	1.46709	8.27998	0.28274	22.2453	0.28274	-1.58714	0.78665	0.979074	0.1	0	LS
Zrm_Ni_@20	5.09588	0.0982717	0.0976864	0.0982717	4108390	0.0969118	96.4667	0.00338361	28.2173	1.46717	8.53515	0.282778	20.5195	0.282778	-0.238937	0.725622	0.905035	0.1	0	LS
Zrm_Ni_@21	5.5198	0.0796226	0.0976864	0.0976864	4095430	0.0236609	19.1636	0.000927617	5.6039	1.46716	8.44141	0.282746	22.4302	0.282746	-1.36715	0.793189	0.966999	0.1	0	LS
Zrm_Ni_@22	5.9138	0.121781	0.0976864	0.121781	4124870	0.0250814	34.3407	0.000963062	11.8134	1.46718	15.8542	0.282692	22.1153	0.282692	-3.28721	0.782055	1.07229	0.1	0	LS
Zrm_Ni_@23	5.71929	0.106165	0.0976864	0.106165	4131100	0.0188458	15.0891	0.000752327	4.51737	1.46719	13.0531	0.282872	19.0165	0.282872	3.96656	0.672533	0.706996	40.77	0.605	HE
Zrm_Ni_@24	5.62952	0.118895	0.0976864	0.118895	4126390	0.0160406	12.8503	0.000584105	3.50916	1.46713	9.63345	0.282899	20.5584	0.282899	4.93396	0.727064	0.653606	40.81	0.719	HE
Zrm_Ni_@25	5.19563	0.110625	0.0976864	0.110625	4127620	0.125838	116.37	0.0047787	33.8516	1.46709	6.98904	0.282775	34.6651	0.282775	-0.367889	1.22585	0.912121	0.1	0	LS
Zrm_Ni_@26	5.68438	0.116028	0.0976864	0.116028	4112320	0.0585626	47.9795	0.00189203	11.9346	1.46716	12.3352	0.282715	17.1484	0.282715	-2.48459	0.606412	1.0283	0.1	0	LS
Zrm_Ni_@27	5.44	0.0793656	0.0976864	0.0976864	4104320	0.0321557	32.3725	0.00129248	10.8134	1.46709	9.65023	0.282888	19.0476	0.282887	4.50125	0.673634	0.677442	40.73	0.608	HE
Zrm_Ni_@28	5.70932	0.122694	0.0976864	0.122694	4104120	0.0554295	60.789	0.00202855	17.2242	1.46714	7.57885	0.28276	23.5401	0.28276	-0.865531	0.832438	0.939458	0.1	0	LS
Zrm_Ni_@29	5.00112	0.130026	0.0976864	0.130026	4091910	0.370141	309.553	0.00805646	51.1228	1.46713	7.06547	0.282906	46.5018	0.282905	4.26323	1.64442	0.657047	0.1	0	LS
Zrm_Ni_@30	5.08591	0.118795	0.0976864	0.118795	4075690	0.0239464	19.1931	0.000949475	5.7091	1.46707	9.95197	0.282726	22.1139	0.282726	-2.08695	0.782004	1.0065	0.1	0	LS
Zrm_Ni_@31	5.42471	0.166749	0.0976864	0.166749	4020960	0.0297795	25.0732	0.00100038	6.6555	1.46713	11.1355	0.282879	16.9012	0.282878	4.1826	0.597721	0.694534	40.12	0.562	HE
Zrm_Ni_@32	5.49454	0.0965986	0.0976864	0.0976864	4040320	0.0688549	69.2628	0.00175121	14.3453	1.46725	6.77794	0.282751	22.0547	0.282751	-1.21671	0.77991	0.958741	0.1	0	LS
Zrm_Ni_@33	5.31498	0.165446	0.0976864	0.165446	4036480	0.0396932	35.8729	0.00168432	11.6197	1.46713	7.66773	0.282745	25.2964	0.282745	-1.40354	0.894546	0.968997	0.1	0	LS
Zrm_Ni_@34	5.36985	0.105805	0.0976864	0.105805	4019790	0.0261688	22.1134	0.00110246	7.45199	1.46712	12.7175	0.282888	18.2537	0.282887	4.52941	0.645558	0.676556	41.54	0.575	HE
Zrm_Ni_@35	5.22022	0.0752795	0.0976864	0.0976864	4027480	0.401575	322.649	0.00879487	52.9824	1.46716	7.28857	0.282818	40.9782	0.282818	1.17049	1.44909	0.827524	0.1	0	LS
Zrm_Ni_@39	5.11548	0.0944556	0.0976864	0.0976864	3969210	0.0486514	42.7871	0.00183408	13.3399	1.46713	9.44661	0.282933	22.944	0.282931	6.07845	0.811434	0.590534	41.05	0.895	HE
Zrm_Ni_@40	5.22521	0.120354	0.0976864	0.120354	3963590	0.0327283	33.4611	0.00122903	11.3265	1.46717	9.94411	0.282936	21.362	0.282936	6.22673	0.755485	0.58205	40.71	0.818	HE
Zrm_Ni_@41	5.59928	0.0939985	0.0976864	0.0976864	3948550	0.136176	113.66	0.00459672	29.8445	1.4671	7.21206	0.282743	29.5424	0.282743	-1.48571	1.04469	0.973507	0.1	0	LS
Zrm_Ni_@42	5.01074	0.161949	0.0976864	0.161949	3944090	0.0235851	26.7912	0.000593193	6.12879	1.46724	7.10253	0.282745	27.9133	0.282745	-1.41902	0.987084	0.969847	0.1	0	LS
Zrm_Ni_@43	5.02071	0.141872	0.0976864	0.141872	3936320	0.235753	196.496	0.00546853	34.2563	1.46722	7.13651	0.282802	27.9878	0.282802	0.615346	0.989719	0.858067	0.1	0	LS
Zrm_Ni_@44	5.17533	0.103252	0.0976864	0.103252	3920300	0.0391708	102.01	0.00143203	34.7258	1.46714	8.77586	0.282737	24.3218	0.282737	-1.69719	0.86008	0.985113	0.1	0	LS
Zrm_Ni_@45	5.04565	0.100175	0.0976864	0.100175	3902440	0.0381799	33.0498	0.00148977	9.92292	1.46709	7.92124	0.282746	21.8875	0.282746	-1.36275	0.773998	0.966758	0.1	0	LS
Zrm_Ni_@46	4.92595	0.11916	0.0976864	0.11916	3885640	0.112911	92.3068	0.00417059	26.1214	1.4671	8.02671	0.282766	27.8843	0.282766	-0.669756	0.986062	0.928705	0.1	0	LS
Zrm_Ni_@47	5.01074	0.0995543	0.0976864	0.0995543	3871120	0.0230165	25.4311	0.000807458	7.12077	1.46716	10.0978	0.282703	22.4589	0.282703	-2.88051	0.794205	1.05001	0.1	0	LS
Zrm_Ni_@48	n.d.	n.d.	n.d.	n.d.	n.d.	n.d.	n.d.	n.d.	n.d.	n.d.	n.d.	n.d.	n.d.	n.d.	n.d.	n.d.	n.d.	0.1	0	LS
Zrm_Ni_@49	4.92595	0.0799813	0.0976864	0.0976864	3855700	0.0243682	26.766	0.00095774	8.65967	1.46709	7.72106	0.282748	22.002	0.282748	-1.31766	0.778046	0.964283	0.1	0	LS
Zrm_Ni_@50	4.7414	0.120601	0.0976864	0.120601	3843560	0.108872	211.104	0.00378555	68.7478	1.46721	9.37294	0.282803	33.3091	0.282803	0.649865	1.1779	0.856169	0.1	0	LS
Zrm_Ni_@51	4.89103	0.099463	0.0976864	0.099463	3844620	0.241922	239.774	0.00546247	48.0518	1.46721	9.81964	0.282833	32.7784	0.282833	1.68993	1.15913	0.798929	0.1	0	LS
Zrm_Ni_@52	5.17034	0.0683483	0.0976864	0.0976864	3865250	0.009328	8.16985	0.00037377	2.48593	1.46714	8.36682	0.282746	25.4848	0.282746	-1.37592	0.901208	0.967481	0.1	0	LS
Zrm_Ni_@53	4.92096	0.10154	0.0976864	0.10154	3884030	0.0181469	15.8526	0.000706813	4.72365	1.4672	8.20183	0.282736	23.1399	0.282736	-1.72654	0.818285	0.986723	0.1	0	LS
Zrm_Ni_@54	4.56185	0.129648	0.0976864	0.129648	3885780	0.111595	89.4528	0.00325526	19.8001	1.46709	11.0036	0.282755	19.8205	0.282755	-1.06708	0.700904	0.950526	0.1	0	LS
Zrm_Ni_@55	5.16535	0.0984955	0.0976864	0.0984955	3894920	0.0706176	69.5041	0.00258065	19.7036	1.46713	7.05238	0.282729	26.3247	0.282729	-1.96248	0.930909	0.999668	0.1	0	LS
Zrm_Ni_@56	4.77269	0.117959	0.0976864	0.117959	3880130	0.0329955	27.377	0.00122313	8.27415	1.46721	6.46544	0.282788	36.8653	0.282788	0.11006	1.30365	0.885852	0.1	0	LS
Zrm_Ni_@59	5.07195	0.0838613	0.0976864	0.0976864	3895110	0	0	0	0	0	0	0	0	0	0	0	0	0	0	Skipped
Zrm_Ni_@60	5.20162	0.119835	0.0976864	0.119835	3900960	0.19024	231.458	0.0060298	65.3327	1.46714	7.25195	0.282815	32.7709	0.282815	1.07258	1.15886	0.832912	0.1	0	LS
Zrm_Ni_@61	5.35624	0.0817148	0.0976864	0.0976864	3914370	0.144911	216.601	0.00506697	65.7489	1.46715	7.31118	0.282818	32.3535	0.282818	1.16594	1.1441	0.827774	0.1	0	LS
Zrm_Ni_@63	5.06696	0.0800337	0.0976864	0.0976864	3912250	0.0558048	66.6622	0.00195169	19.0948	1.46715	7.57058	0.282744	25.1323	0.282744	-1.45046	0.888742	0.971573	0.1	0	LS
Zrm_Ni_@64	5.43604	0.102185	0.0976864	0.102185	3936070	0.047092	57.9827	0.00187801	20.0001	1.46715	6.74459	0.282772	25.0405	0.282772	-0.461304	0.885496	0.917254	0.1	0	LS
Zrm_Ni_@65	4.94726	0.113405	0.0976864	0.113405	3935290	0.364803	297.225	0.00792265	49.0303	1.46721	7.33794	0.282856	41.6091	0.282856	2.52885	1.4714	0.752716	0.1	0	LS
Zrm_Ni_@66	5.41609	0.0711769	0.0976864	0.0976864	3932310	0.0604019	58.3929	0.00215584	17.0674	1.46716	9.13096	0.282747	23.4002	0.282747	-1.34826	0.82749	0.965963	0.1	0	LS
Zrm_Ni_@67	5.18167	0.13851	0.0976864	0.13851	3939070	0.0752381	60.3885	0.00274452	16.4967	1.46713	8.42596	0.282771	24.25	0.282771	-0.497183	0.857544	0.919225	0.1	0	LS
Zrm_Ni_@68	5.27644	0.161741	0.0976864	0.161741	3948360	0.463399	398.611	0.00991215	68.2016	1.46715	6.84316	0.282758	48.1781	0.282758	-0.953783	1.7037	0.944305	0.1	0	LS
Zrm_Ni_@69	5.08192	0.0933857	0.0976864	0.0976864	3940200	0.0874532	108.366	0.00356796	37.7875	1.46714	8.85608	0.282939	29.3551	0.282939	5.43615	1.03807	0.59225	0.1	0	LS
Zrm_Ni_@76	5.39115	0.0828639	0.0976864	0.0976864	3972070	0.133005	107.346	0.00508888	31.5395	1.46715	6.9215	0.282768	27.1615	0.282768	-0.607982	0.9605	0.925312	0.1	0	LS
Zrm_Ni_@83	4.97718	0.105279	0.0976864	0.105279	3806570	0.0457626	76.6867	0.0015786	24.4117	1.46713	8.12592	0.28277	26.1476	0.28277	-0.526275	0.924646	0.920823	0.1	0	LS
Zrm_Ni_@85	4.8525	0.153703	0.0976864	0.153703	3768180	0.135521	123.798	0.00476905	35.0433	1.4672	6.43846	0.282771	29.8297	0.282771	-0.476537	1.05486	0.918091	0.1	0	LS
Zrm_Br_@1	4.67793	0.10653	0.0976864	0.10653	3761100	0.586013	472.259	0.01233	75.7435	1.46719	8.72186	0.282804	52.1421	0.282804	0.668541	1.84388	0.855141	0.1	0	W/D
Zrm_Br_@2	5.40611	0.119305	0.0976864	0.119305	3766720	0.0845049	76.6187	0.0032663	25.7656	1.46718	8.17716	0.282783	30.0099	0.282783	-0.0569896	1.06123	0.895035	0.1	0	W/D
Zrm_Br_@3	5.42606	0.132176	0.0976864	0.132176	3789100	0.0534961	44.2155	0.00194593	12.4961	1.46721	8.71497	0.282748	24.0787	0.282748	-1.29346	0.851485	0.962955	0.1	0	W/D
Zrm_Br_@4	5.23654	0.133173	0.0976864	0.133173	3791810	0.380212	315.264	0.00847182	52.3642	1.46715	8.17085	0.282826	37.977	0.282826	1.46695	1.34296	0.811206	0.1	0	W/D
Zrm_Br_@5	5.40113	0.160634	0.0976864	0.160634	3842170	0.453871	369.668	0.00992691	61.6534	1.46716	7.83831	0.28302	50.5352	0.28302	8.32219	1.78705	0.432482	0.1	0	W/D
Zrm_Br_@6	5.08691	0.0912256	0.0976864	0.0976864	3847440	0.565	473.807	0.0122281	80.9198	1.46715	8.65109	0.282897	59.8498	0.282897	3.97117	2.11644	0.673168	0.1	0	W/D
Zrm_Br_@7	5.05699	0.120696	0.0976864	0.120696	3863530	0.526497	437.464	0.0113715	74.0073	1.46721	8.89007	0.282903	52.0208	0.282903	4.18944	1.83959	0.66112	0.1	0	W/D
Zrm_Br_@8	5.16814	0.0893134	0.0976864	0.0976864	3833840	0	0	0	0	0	0	0	0	0	0	0	0	0	0	Skipped
Zrm_Br_@9	5.38259	0.114981	0.0976864	0.114981	3853360	0.260812	216.973	0.00600633	39.4191	1.46718	8.70081	0.282854	29.3118	0.282854	2.43943	1.03654	0.757643	0.1	0	W/D
Zrm_Br_@10	5.23796	0.125326	0.0976864	0.125326	3855310	0.501815	401.875	0.0109814	66.4256	1.46717	9.16383	0.282787	44.2141	0.282787	0.0895516	1.56352	0.88698	0.1	0	W/D
Zrm_Br_@11	5.44244	0.0987614	0.0976864	0.0987614	3877060	0.051015	53.7246	0.00185982	15.842	1.46713	7.66783	0.282748	21.5196	0.282748	-1.31078	0.760989	0.963905	0.1	0	W/D
Zrm_Br_@12	5.07338	0.102956	0.0976864	0.102956	3875300	0.147601	123.274	0.00463777	30.0496	1.4671	7.75022	0.282752	30.8606	0.282752	-1.15664	1.09131	0.955443	0.1	0	W/D
Zrm_Br_@13	5.51227	0.0891832	0.0976864	0.0976864	3875400	0.363403	300.893	0.00815028	50.2693	1.46722	9.07874	0.282797	26.8056	0.282797	0.415099	0.947916	0.86908	0.1	0	W/D
Zrm_Br_@15	4.829	0.0874769	0.0976864	0.0976864	3877620	0.654721	527.69	0.0137179	82.5713	1.46712	8.6166	0.282948	56.8616	0.282948	5.76668	2.01077	0.573977	0.1	0	W/D
Zrm_Br_@16	5.46738	0.139978	0.0976864	0.139978	3914550	0.416089	341.451	0.00899423	57.4463	1.46715	8.56808	0.282928	42.2193	0.282927	5.04127	1.49298	0.614073	0.1	0	W/D
Zrm_Br_@17	5.50229	0.0968479	0.0976864	0.0976864	3922890	0.0370545	36.9362	0.00135764	11.4977	1.46719	7.58092	0.282759	27.6157	0.282759	-0.901307	0.976563	0.941423	0.1	0	W/D
Zrm_Br_@18	5.54718	0.122073	0.0976864	0.122073	3913750	0.105989	94.7674	0.00361422	27.3085	1.46707	9.12024	0.282742	21.3974	0.282742	-1.53325	0.756668	0.976116	0.1	0	W/D
Zrm_Br_@19	5.51227	0.099631	0.0976864	0.099631	3907930	0.455694	371.983	0.00976789	61.8715	1.46715	8.67244	0.282844	47.4102	0.282844	2.07747	1.67655	0.777586	0.1	0	W/D
Zrm_Br_@20	5.83146	0.105216	0.0976864	0.105216	3907760	0.381772	329.677	0.00847121	58.3796	1.46718	8.71423	0.282853	42.1566	0.282853	2.42197	1.49077	0.758605	0.1	0	W/D
Zrm_Br_@21	6.03095	0.0909397	0.0976864	0.0976864	3917300	0.0246333	20.2686	0.000921875	5.74947	1.46709	9.43733	0.282745	22.0146	0.282745	-1.39721	0.778491	0.96865	0.1	0	W/D
Zrm_Br_@22	5.45242	0.0758065	0.0976864	0.0976864	3910520	0.480971	390.577	0.0103788	64.8008	1.46716	8.645	0.282865	52.6773	0.282865	2.83667	1.8628	0.735748	0.1	0	W/D
Zrm_Br_@23	5.63196	0.1029	0.0976864	0.1029	3888870	0.320795	257.066	0.00721044	43.8356	1.46718	8.89789	0.282822	37.8707	0.282822	1.30415	1.33921	0.820168	0.1	0	W/D
Zrm_Br_@24	5.50229	0.0681653	0.0976864	0.0976864	3886090	0.711336	572.29	0.0152047	91.45	1.46716	8.55329	0.282909	57.1928	0.282909	4.40102	2.02249	0.649438	0.1	0	W/D
Zrm_Br_@25	5.60703	0.111827	0.0976864	0.111827	3871930	0.452666	379.625	0.00973102	64.7681	1.46715	8.48719	0.28295	54.8764	0.28295	5.83457	1.94057	0.570223	0.1	0	W/D
Zrm_Br_@26	5.40753	0.125844	0.0976864	0.125844	3869290	0.58571	468.88	0.0130429	78.8795	1.46721	8.81868	0.282921	49.935	0.282921	4.8159	1.76583	0.626525	0.1	0	W/D
Zrm_Br_@27	5.59206	0.108811	0.0976864	0.108811	3865870	0.127666	131.081	0.00414695	38.2359	1.46714	8.42303	0.282793	31.7453	0.282793	0.275895	1.12259	0.876735	0.1	0	W/D
Zrm_Br_@28	5.45242	0.0760972	0.0976864	0.0976864	3862400	0.622802	499.498	0.013273	80.5859	1.46716	8.40135	0.282876	48.5756	0.282876	3.23596	1.71776	0.713732	0.1	0	W/D
Zrm_Br_@29	5.61201	0.0684247	0.0976864	0.0976864	3856610	0.507657	406.626	0.0107316	65.127	1.4672	8.66906	0.282883	43.7372	0.282883	3.46471	1.54666	0.701114	0.1	0	W/D
Zrm_Br_@30	5.32773	0.156479	0.0976864	0.156479	3857290	0.613883	494.29	0.0129709	77.9942	1.46722	8.64593	0.282855	66.8883	0.282855	2.46774	2.36534	0.756083	0.1	0	W/D
Zrm_Br_@31	5.31523	0.0869272	0.0976864	0.0976864	3814300	0.545171	439.44	0.0118077	71.3391	1.46722	8.37417	0.282781	39.1671	0.282781	-0.138745	1.38505	0.899529	0.1	0	W/D
Zrm_Br_@32	5.91372	0.136836	0.0976864	0.136836	3808610	0.0599902	48.6811	0.00216886	13.1394	1.46714	8.88577	0.282773	27.1952	0.282773	-0.406225	0.961693	0.914227	0.1	0	W/D
Zrm_Br_@33	5.70425	0.104671	0.0976864	0.104671	3802820	0.15636	165.733	0.00525738	48.787	1.46719	9.05092	0.282784	23.0376	0.282784	-0.0294345	0.814669	0.893521	0.1	0	W/D
Zrm_Br_@34	5.39503	0.150644	0.0976864	0.150644	3771900	0.102001	82.5977	0.00351567	21.7399	1.46712	9.63122	0.282782	18.2565	0.282782	-0.102561	0.645596	0.89754	0.1	0	W/D
Zrm_Br_@35	5.22546	0.160342	0.0976864	0.160342	3759130	0.556469	468.352	0.0119071	79.6609	1.46723	8.78176	0.282856	45.4383	0.282856	2.49567	1.60681	0.754544	0.1	0	W/D
Zrm_Br_@36	5.22546	0.0848104	0.0976864	0.0976864	3760610	0.395262	317.283	0.00860191	52.2913	1.46716	8.47813	0.282914	42.3198	0.282914	4.56228	1.49654	0.640533	0.1	0	W/D
Zrm_Br_@37	5.08082	0.159725	0.0976864	0.159725	3685750	0.377902	306.34	0.00826957	51.4977	1.46721	8.55179	0.282904	39.8689	0.282904	4.20321	1.40987	0.66036	0.1	0	W/D
Zrm_Br_@38	5.05589	0.0749071	0.0976864	0.0976864	3683630	0.0131696	21.4218	0.000493923	6.54661	1.46716	9.51193	0.28272	22.693	0.28272	-2.28335	0.802483	1.01727	0.1	0	LS
Zrm_Br_@39	5.04092	0.0939489	0.0976864	0.0976864	3730940	0.701533	562.865	0.0149405	89.783	1.46714	8.70012	0.282882	59.0389	0.282882	3.44574	2.08777	0.702161	0.1	0	W/D
Zrm_Br_@40	5.5646	0.117178	0.0976864	0.117178	3729770	0.130301	105.432	0.00436551	27.1468	1.46716	9.27325	0.282785	18.7501	0.282785	0.0100573	0.663051	0.89135	0.1	0	W/D
Zrm_Br_@41	5.38506	0.0976328	0.0976864	0.0976864	3745030	0.246284	199.655	0.00564653	34.1952	1.46718	8.24307	0.282935	22.8011	0.282935	5.31488	0.806306	0.598953	0.1	0	W/D
Zrm_Br_@42	5.14067	0.111633	0.0976864	0.111633	3757290	0.424391	369.244	0.00949335	66.8145	1.46717	8.53874	0.282838	49.0877	0.282838	1.86233	1.73587	0.789435	0.1	0	W/D
Zrm_Br_@43	5.48979	0.115514	0.0976864	0.115514	3783070	0.330066	300.346	0.00739343	55.7077	1.46716	8.61523	0.282856	31.4665	0.282856	2.52607	1.11274	0.752869	0.1	0	W/D
Zrm_Br_@44	5.62944	0.0994946	0.0976864	0.0994946	3774400	0.12956	106.509	0.00443153	27.4497	1.46715	7.07243	0.28274	43.4087	0.28274	-1.59517	1.53504	0.979514	0.1	0	W/D
Zrm_Br_@45	5.71422	0.137112	0.0976864	0.137112	3782670	0.140745	194.678	0.00334119	42.5369	1.46724	8.07519	0.282801	24.2692	0.282801	0.552908	0.858221	0.861502	0.1	0	W/D
Zrm_Br_@46	7.18052	0.129251	0.0976864	0.129251	3784760	0.0445685	36.7967	0.00160509	10.4637	1.46716	13.432	0.282663	16.331	0.282663	-4.31614	0.577506	1.12863	0.1	0	LS
Zrm_Br_@47	5.0908	0.10968	0.0976864	0.10968	3781480	0.733694	592.741	0.0156268	94.3985	1.46715	8.63442	0.282938	75.4418	0.282938	5.42218	2.66781	0.593023	0.1	0	W/D
Zrm_Br_@48	5.37508	0.116132	0.0976864	0.116132	3784580	0.544246	439.723	0.0117062	71.9063	1.46716	8.34576	0.283016	58.0384	0.283016	8.15343	2.05239	0.441837	0.1	0	W/D
Zrm_Br_@49	5.405	0.144952	0.0976864	0.144952	3797200	0.562013	451.624	0.0120651	72.9212	1.46714	8.57805	0.283027	53.7914	0.283027	8.55372	1.9022	0.419644	0.1	0	W/D
Zrm_Br_@50	5.60743	0.102436	0.0976864	0.102436	3859100	0.587416	484.248	0.0125737	77.7765	1.46715	8.57658	0.282938	59.6387	0.282938	5.41143	2.10898	0.593617	0.1	0	W/D
Zrm_Br_@51	5.81687	0.120768	0.0976864	0.120768	3860970	0.0729795	65.8696	0.00239378	17.4687	1.46717	8.6387	0.282745	21.3266	0.282745	-1.40173	0.754162	0.968898	0.1	0	W/D
Zrm_Br_@52	5.68223	0.0850321	0.0976864	0.0976864	3851340	0.198403	190.835	0.00638914	51.6316	1.46721	9.1186	0.282793	37.4885	0.282793	0.270022	1.32569	0.877058	0.1	0	W/D
Zrm_Br_@53	5.59745	0.0946585	0.0976864	0.0976864	3856240	0.553467	447.837	0.0120504	72.8073	1.46723	8.50083	0.282892	64.3927	0.282892	3.78377	2.27709	0.683511	0.1	0	W/D
Zrm_Br_@54	5.77199	0.103659	0.0976864	0.103659	3877780	0.453213	364.654	0.00975875	58.5976	1.46718	8.69178	0.282887	49.4921	0.282887	3.60451	1.75017	0.693402	0.1	0	W/D
Zrm_Br_@55	5.60244	0.116766	0.0976864	0.116766	3886010	0.0500743	40.5386	0.00159875	9.86471	1.46718	11.9377	0.282927	24.4021	0.282926	5.56471	0.862971	0.606522	26	0.571	Siebengebirge
Zrm_Br_@57	6.0363	0.102818	0.0976864	0.102818	3908350	0.12962	105.335	0.00457999	28.3243	1.46711	8.57306	0.282766	27.4965	0.282766	-0.679872	0.972346	0.929261	0.1	0	W/D
Nette_z1@3*	5.66719	0.108872	0.0774626	0.108872	4.69718e+06	0.413166	348.975	0.00892582	58.5965	1.46717	6.97618	0.282677	39.354	0.282677	-3.83032	1.39166	1.10204	0.1	0	LS
Nette_z2@3*	6.38611	0.113695	0.0774626	0.113695	4.77561e+06	0.0793237	68.0572	0.00238023	15.9039	1.46717	13.0788	0.282668	19.7023	0.282668	-4.1339	0.696723	1.11866	0.1	0	LS
Nette_z3@3*	6.16558	0.0931384	0.0774626	0.0931384	4.76381e+06	0.477762	632.178	0.00910789	89.0947	1.46712	10.6121	0.283022	92.9443	0.283022	8.36566	3.28675	0.430072	0.1	0	LS
Nette_z4@3*	5.83689	0.0754618	0.0774626	0.0774626	4.67455e+06	0.271442	459.466	0.00662089	79.9496	1.46714	6.2116	0.282649	39.9647	0.282649	-4.79148	1.41326	1.15464	0.1	0	LS
Nette_z5@3*	6.20424	0.0839449	0.0774626	0.0839449	4.70521e+06	0.492511	402.873	0.010559	67.5464	1.46715	7.32631	0.282801	40.9379	0.282801	0.582264	1.44767	0.859887	0.1	0	LS
Nette_z6@3*	6.20378	0.0598441	0.0774626	0.0774626	4.67913e+06	0.0380199	40.74	0.0015247	13.5271	1.4672	7.94306	0.282602	26.8421	0.282602	-6.45589	0.949204	1.2456	0.1	0	LS
Nette_z7@3*	5.48114	0.0892787	0.0774626	0.0892787	4.64469e+06	0.372575	298.421	0.00814566	48.9352	1.46718	7.40915	0.282845	34.2865	0.282845	2.10886	1.21246	0.775857	0.1	0	LS
Nette_z8@3*	5.79731	0.0889813	0.0774626	0.0889813	4.61901e+06	0.343364	275.402	0.00694927	41.701	1.46717	9.4794	0.282855	34.6362	0.282855	2.46406	1.22482	0.756286	0.1	0	LS
Nette_z9@3*	5.23105	0.0941172	0.0774626	0.0941172	4.63436e+06	0.379516	305.917	0.0077254	47.7555	1.46716	8.64837	0.282874	36.3731	0.282874	3.166	1.28625	0.71759	0.1	0	LS
Nette_z10@3*	5.37714	0.0781418	0.0774626	0.0781418	4.62138e+06	0.804944	1091.32	0.0167916	178.225	1.46711	10.6566	0.282674	68.1893	0.282674	-3.92118	2.41135	1.10701	0.1	0	LS
Zrd_Ne1a_@112	6.87524	0.0640876	0.088543	0.088543	4396350	0.00657086	5.30951	0.000197178	1.23003	1.46713	16.5184	0.282059	13.3385	0.282057	-14.0649	0.472236	2.0931	525.3	70	RH
Zrd_Ne1a_@113	5.23903	0.13014	0.088543	0.13014	4392750	0.013869	15.692	0.000435251	3.92142	1.46717	15.6471	0.281026	19.9559	0.281003	-0.147442	0.710154	3.16509	2761	4.62	RH
Zrd_Ne1a_@114	7.9727	0.0969336	0.088543	0.0969336	4408650	0.00470189	7.30496	0.000119612	1.81099	1.46723	14.7366	0.282287	18.7526	0.282286	-6.86929	0.663857	1.66793	484.5	58.8	RH
Zrd_Ne1a_@115	8.02258	0.113785	0.088543	0.113785	4423210	0.0515961	41.8961	0.00155453	9.39841	1.46717	17.9416	0.282146	18.0871	0.282112	2.68826	0.641304	1.71625	1181	85.5	RH
Zrd_Ne1a_@116	8.70102	0.106117	0.088543	0.106117	4427550	0.0161621	12.9863	0.000523837	3.22342	1.46711	14.0476	0.282344	18.3353	0.282334	5.2788	0.649759	1.38105	947.2	45.8	RH
Zrd_Ne1a_@117	7.24937	0.0789838	0.088543	0.088543	4441900	0.0336135	26.9655	0.00101897	6.28901	1.4672	13.4457	0.282503	20.2475	0.282496	-1.74869	0.716612	1.30249	381.3	103	RH
Zrd_Ne1a_@118	5.36873	0.0890339	0.088543	0.0890339	4429270	0.0113003	9.06307	0.000350549	2.11813	1.46715	15.6612	0.281834	20.6301	0.281826	-8.25363	0.731411	2.28715	1145	21.3	RH
Zrd_Ne1a_@119	6.93011	0.0798783	0.088543	0.088543	4447410	0.00300016	2.40352	8.398e-05	0.504764	1.46713	13.4071	0.281559	19.2108	0.281559	-33.1407	0.68004	3.06393	460.5	64.9	RH
Zrd_Ne1a_@120	n.d.	n.d.	n.d.	n.d.	n.d.	n.d.	n.d.	n.d.	n.d.	n.d.	n.d.	n.d.	n.d.	n.d.	n.d.	n.d.	n.d.	0.1	0	LS
Zrd_Ne1a_@121	11.3599	0.0979856	0.088543	0.0979856	4478470	0.000876776	0.708633	2.22581e-05	0.134566	1.46713	18.8349	0.282275	17.2324	0.282275	-5.71057	0.610133	1.66123	553.2	18.2	RH
Zrd_Ne1a_@122	4.41094	0.0714056	0.088543	0.088543	4460840	0.142638	198.82	0.00493742	64.2876	1.46719	6.37325	0.283099	34.4201	0.283095	11.805	1.21728	0.27017	37.83	0.686	RH
Zrd_Ne1a_@123	6.0272	0.0999623	0.088543	0.0999623	4463910	0.0126395	11.1371	0.000441532	3.19553	1.46717	12.0205	0.282258	19.944	0.282249	5.61024	0.707008	1.48495	1096	19	RH
Zrd_Ne1a_@124	5.88254	0.0761334	0.088543	0.088543	4451700	0.0266591	39.3514	0.00086616	8.50645	1.46715	23.1292	0.282132	16.0619	0.28211	5.89674	0.569683	1.65623	1324	10	RH
Zrd_Ne1a_@125	7.82305	0.0788933	0.088543	0.088543	4478930	0.0138454	14.8468	0.000451911	4.17729	1.46714	14.3472	0.281068	15.9099	0.281055	-27.2586	0.564537	3.61612	1512	18.2	RH
Zrd_Ne1a_@126	5.75783	0.0753885	0.088543	0.088543	4475850	0.0699355	70.7328	0.00242881	19.1741	1.46721	7.61523	0.282743	25.0846	0.282743	-1.47904	0.887056	0.973246	0.2264	0.0354	RH
Zrd_Ne1a_@127	7.6684	0.125443	0.088543	0.125443	4490290	0.0213397	26.2005	0.000805408	9.61601	1.46721	12.5663	0.281997	27.2594	0.281979	-1.66768	0.966554	1.96843	1196	12.6	RH
Zrd_Ne1a_@128	8.4915	0.091177	0.088543	0.091177	4493070	0.036107	29.5541	0.00116934	7.29834	1.46715	16.4658	0.281882	17.8131	0.281846	3.91901	0.632264	2.03125	1648	10.4	RH
Zrd_Ne1a_@129	9.29963	0.115787	0.088543	0.115787	4496680	0.0110301	9.52848	0.000280672	2.04891	1.46714	21.2249	0.281506	17.4008	0.281496	-4.7631	0.61786	2.64185	1810	20.6	RH
Zrd_Ne1a_@130	7.83302	0.123802	0.088543	0.123802	4495690	0.0241417	47.9275	0.000717279	13.5556	1.46713	15.5621	0.282025	18.0549	0.282011	-4.11758	0.639957	1.97303	1038	16.2	RH
Zrd_Ne1a_@131	6.79542	0.10519	0.088543	0.10519	4488450	0.00267607	2.27767	6.60387e-05	0.429672	1.46718	18.0958	0.281583	17.1266	0.281583	-28.8303	0.606474	2.96196	615.3	8.36	RH
Zrd_Ne1a_@132	6.38033	0.0968261	0.088543	0.0968261	4512950	0.0149306	12.0778	0.00046224	2.7947	1.46714	17.99	0.282124	18.3982	0.282115	0.488466	0.652186	1.75373	1079	10.5	RH
Zrd_Ne1a_@133	5.06875	0.0910116	0.088543	0.0910116	4513440	0.0279578	79.8816	0.000757208	18.9965	1.46711	18.3387	0.28111	17.7734	0.281071	1.30834	0.632429	3.05219	2721	5.08	RH
Zrd_Ne1a_@134	5.9315	0.0953547	0.088543	0.0953547	4526440	0.0218222	31.3793	0.000639736	8.03534	1.46717	14.0282	0.28218	16.9413	0.282168	0.788857	0.600445	1.68049	1010	15.9	RH
Zrd_Ne1a_@135	6.14095	0.0861836	0.088543	0.088543	4524240	0.026326	21.1219	0.00082228	5.01979	1.46714	18.1653	0.281701	13.0149	0.281683	-12.5101	0.461464	2.54853	1181	15.4	RH
Zrd_Ne1a_@136	5.14355	0.0779537	0.088543	0.088543	4412750	0.00929155	7.67591	0.000336838	2.13177	1.46715	14.3551	0.280701	17.4599	0.280681	-1.91445	0.621935	3.59783	3173	3.93	RH
Zrd_Ne1a_@137	8.58458	0.0846358	0.088543	0.088543	4376100	0.0259553	26.7473	0.000766447	6.68775	1.46718	18.4143	0.281773	17.4072	0.281749	0.390146	0.617852	2.22272	1644	7.78	RH
Zrd_Ne1a_@138	5.0488	0.16231	0.088543	0.16231	4379310	0.00648909	12.016	0.000233334	3.67846	1.4672	15.0491	0.281548	18.1546	0.281544	-23.1806	0.643327	2.91683	927.8	43.6	RH
Zrd_Ne1a_@139	6.19082	0.0988432	0.088543	0.0988432	4361190	0.0149692	12.9102	0.000494257	3.5574	1.46715	17.6211	0.281449	16.525	0.281432	-7.42301	0.58674	2.7735	1793	7.77	RH
Zrd_Ne2_@81	6.89399	0.129436	0.088543	0.129436	4368800	0.0162522	13.1964	0.000516479	3.24509	1.46712	15.1181	0.281965	19.7611	0.281952	-0.139728	0.700856	1.9739	1305	21.4	RH
Zrd_Ne2_@82	5.32807	0.105075	0.088543	0.105075	4351310	0.0525406	51.4716	0.0020206	16.7407	1.46715	6.48022	0.282759	30.5602	0.282759	-0.896368	1.08069	0.941595	0.6369	0.141	LS
Zrd_Ne2_@83	4.57005	0.102352	0.088543	0.102352	4358250	0.045202	37.8865	0.00151479	9.59473	1.46714	17.9542	0.281925	14.9563	0.281878	4.18701	0.530816	1.98449	1609	16.7	RH
Zrd_Ne2_@84	5.50261	0.0891516	0.088543	0.0891516	4362800	0.00724465	5.8027	0.00028195	1.70804	1.46715	12.8915	0.282719	22.111	0.282719	-2.29743	0.781903	1.01887	1.106	0.203	LS
Zrd_Ne2_@85	5.47768	0.0867821	0.088543	0.088543	4380380	0.0497939	40.7215	0.00177505	11.105	1.46714	12.6479	0.281984	20.7659	0.281936	1.82025	0.73668	1.95698	1416	12.8	RH
Zrd_Ne2_@86	4.36558	0.088477	0.088543	0.088543	4376930	0.0237713	20.9046	0.000883542	5.72436	1.46716	15.8968	0.281937	18.4962	0.28191	5.88098	0.656491	1.91121	1634	39.6	RH
Zrd_Ne2_@87	5.06376	0.132643	0.088543	0.132643	4390840	0.0268667	22.3628	0.000875901	5.43639	1.46717	17.2388	0.281734	15.0669	0.281707	-1.82201	0.534747	2.31821	1612	5.28	RH
Zrd_Ne2_@88	4.95903	0.101103	0.088543	0.101103	4401830	0.00836408	7.41653	0.000275207	1.94747	1.46722	14.9866	0.28101	21.6148	0.280996	-2.4654	0.769034	3.22179	2674	10	RH
Zrd_Ne2_@89	4.92911	0.0641561	0.088543	0.088543	4386910	0.0468057	57.2474	0.00143475	15.6753	1.46717	15.8007	0.282004	19.9455	0.281967	1.70716	0.707491	1.91974	1363	56.7	RH
Zrd_Ne2_@90	4.18106	0.0767526	0.088543	0.088543	4388120	0.00633328	5.42185	0.000241692	1.65979	1.46716	14.4582	0.281931	19.7392	0.281925	-3.2359	0.699929	2.06684	1211	62.9	RH
Zrd_Ne2_@91	5.6622	0.117839	0.088543	0.117839	4404880	0.0285642	23.5012	0.000910788	5.79249	1.46715	14.2218	0.281816	20.0792	0.281791	-2.65932	0.712367	2.22809	1446	15.5	RH
Zrd_Ne2_@92	5.63726	0.0933455	0.088543	0.0933455	4407570	0.01671	14.0607	0.000519401	3.46898	1.46717	17.3818	0.282171	17.9921	0.28216	3.32744	0.637868	1.64237	1134	6.16	RH
Zrd_Ne2_@93	4.79945	0.0842712	0.088543	0.088543	4402040	0.0298972	33.7551	0.000999871	9.20089	1.46716	15.0718	0.281831	15.1165	0.281798	3.97961	0.536644	2.09015	1724	12.2	RH
Zrd_Ne2_@94	4.57194	0.0855308	0.088543	0.088543	4408290	0.0408705	34.7002	0.00142826	9.0417	1.46717	13.8555	0.281951	16.8452	0.281911	2.97486	0.597713	1.96706	1506	6.06	RH
Zrd_Ne2_@95	6.2723	0.096567	0.088543	0.096567	4414730	0.0118471	10.0422	0.00037972	2.37825	1.46717	17.3073	0.28218	16.9404	0.282172	1.5417	0.600448	1.66038	1036	27.7	RH
Zrd_Ne2_@96	5.76369	0.104946	0.088543	0.104946	4409050	0.0176693	14.3404	0.000589586	3.71304	1.46718	18.4761	0.282129	20.4163	0.282117	1.86676	0.723819	1.72543	1137	11.8	RH
Zrd_Ne2_@97	4.96088	0.111573	0.088543	0.111573	4424770	0.0503576	58.2	0.00181958	17.1949	1.46724	6.05421	0.282659	44.9637	0.282659	-4.46661	1.59003	1.13685	0.0852	0.0112	LS
Zrd_Ne2_@98	6.41192	0.104175	0.088543	0.104175	4428350	0.0205179	18.5664	0.00059495	4.46642	1.46717	16.0759	0.282237	17.5014	0.282226	2.60481	0.620281	1.57185	999.6	14.4	RH
Zrd_Ne2_@99	3.78409	0.0919133	0.088543	0.0919133	4419180	0.0169581	13.5859	0.000523247	3.17023	1.46717	15.5195	0.282239	17.2242	0.28223	-0.00506537	0.610289	1.61493	877.1	35.7	RH
Zrd_Ne2_@100	8.37655	0.0962804	0.088543	0.0962804	4436540	0.0278751	24.5686	0.00099719	7.61783	1.46733	9.17935	0.282109	43.1771	0.282086	2.2586	1.53098	1.7572	1202	7.04	RH
Zrd_Ne2_@101	5.51437	0.135484	0.088543	0.135484	4437660	0.0191617	15.7932	0.000625419	3.99266	1.46717	14.2214	0.281798	20.2158	0.28178	-2.20834	0.717274	2.23285	1482	17.3	RH
Zrd_Ne2_@103	5.46949	0.0767321	0.088543	0.088543	4447150	0.117285	94.8434	0.00411092	25.7046	1.46711	8.12406	0.282803	24.5204	0.282803	0.655523	0.867106	0.856506	0.885	0.143	LS
Zrd_Ne2_@104	5.54927	0.102237	0.088543	0.102237	4467660	0.0167667	14.9253	0.000517075	3.39456	1.46715	17.903	0.2822	15.5834	0.28219	2.1649	0.55235	1.62602	1036	4.55	RH
Zrd_Ne2_@105	5.08554	0.094887	0.088543	0.094887	4467790	0.0278026	48.7576	0.000954157	14.8442	1.46725	5.4366	0.282143	50.9959	0.28213	-6.40786	1.80637	1.86193	750.6	391	RH
Zrd_Ne2_@106	5.19025	0.091489	0.088543	0.091489	4477500	0.0367803	36.6494	0.00127587	10.9414	1.46718	9.89369	0.282743	21.3508	0.282743	-1.47946	0.755019	0.973589	0.6143	0.117	LS
Zrd_Ne2_@107	6.01799	0.111661	0.088543	0.111661	4381940	0.0255777	26.5391	0.000851883	7.75906	1.46714	10.1139	0.281975	28.5972	0.281957	-4.59048	1.01377	2.05154	1102	115	RH
Zrd_Ne2_@108	5.45453	0.114925	0.088543	0.114925	4377140	0.0335868	28.7747	0.00116833	8.26256	1.46716	16.0045	0.282262	20.1206	0.282253	-9.3223	0.712192	1.75414	426.8	6.03	RH
Zrd_Ne2_@109	3.94864	0.0814779	0.088543	0.088543	4365910	0.0267618	21.8578	0.000850008	5.39907	1.46714	11.5782	0.282244	23.3269	0.282229	0.693996	0.826582	1.60335	909.8	15.4	RH
Zrd_Ne2_@110	5.14039	0.0958507	0.088543	0.0958507	4347100	0.0289385	23.4618	0.00108167	6.59239	1.46711	8.33618	0.282725	23.2205	0.282725	-2.09281	0.821136	1.00733	0.7208	0.127	LS
Zrd_Ne2_@111	6.52162	0.0908999	0.088543	0.0908999	4338480	0.0119911	12.772	0.000378262	3.10425	1.46712	16.3372	0.282149	16.4837	0.282141	0.926159	0.58429	1.71155	1057	9.19	RH
Zrd_Ne2_@112	6.92551	0.126449	0.088543	0.126449	4331180	0.075265	80.7934	0.00181519	14.6557	1.4671	16.4957	0.282351	17.3235	0.282335	-5.34226	0.613251	1.5759	474.1	16.4	RH
Zrd_Ne2_@113	5.7936	0.109053	0.088543	0.109053	4316200	0.0291728	27.5917	0.000922097	7.06086	1.46714	13.9371	0.28261	24.4255	0.282603	2.91088	0.864555	1.07734	419.2	6.11	RH
Zrd_Ni_@86	4.91488	0.112757	0.088543	0.112757	4315740	0.0156232	13.0845	0.00046592	3.12058	1.46715	16.2396	0.282236	16.8053	0.282227	1.47032	0.595541	1.59109	946.9	17.7	RH
Zrd_Ni_@87	6.18139	0.106071	0.088543	0.106071	4324780	0.0195146	24.1627	0.000634666	5.63598	1.4671	16.0838	0.282151	19.0504	0.282137	2.44764	0.675384	1.68847	1131	15.3	RH
Zrd_Ni_@88	5.97197	0.107636	0.088543	0.107636	4323150	0.0490477	42.6168	0.00152614	10.9337	1.46715	15.7182	0.282058	19.1518	0.282017	4.87313	0.679432	1.7949	1424	14.5	RH
Zrd_Ni_@89	4.61072	0.0733169	0.088543	0.088543	4320760	0.0251197	29.1617	0.000761701	6.65519	1.4671	15.7601	0.282001	18.8491	0.281981	1.7119	0.668567	1.90143	1341	9.06	RH
Zrd_Ni_@90	5.88222	0.105807	0.088543	0.105807	4340740	0.0198871	18.6376	0.000669608	4.87185	1.46714	18.0113	0.281901	15.3124	0.281881	4.00352	0.543441	1.9848	1597	11	RH
Zrd_Ni_@91	6.25618	0.0860396	0.088543	0.088543	4341860	0.01567	13.3273	0.000489216	3.33246	1.46719	15.4827	0.282194	18.7414	0.282184	1.90112	0.664281	1.6381	1033	21.1	RH
Zrd_Ni_@92	7.50773	0.106381	0.088543	0.106381	4346670	0.0106892	8.57566	0.000322714	1.97224	1.46717	15.4672	0.28217	17.953	0.282164	0.7439	0.636307	1.68625	1014	23.2	RH
Zrd_Ni_@93	6.21131	0.12806	0.088543	0.12806	4348710	0.0170051	13.7725	0.00052209	3.16107	1.46713	17.7647	0.281845	16.386	0.281828	5.10487	0.581715	2.03034	1727	5.06	RH
Zrd_Ni_@94	7.21355	0.0723418	0.088543	0.088543	4350680	0.0193636	15.9482	0.000578732	3.61741	1.46715	17.1553	0.281652	14.765	0.281632	-0.0576522	0.52426	2.37843	1804	5.57	RH
Zrd_Ni_@95	6.42073	0.110558	0.088543	0.110558	4345400	0.0232763	21.2674	0.000716684	5.24113	1.46715	15.6901	0.282215	20.988	0.282201	3.19878	0.743962	1.59198	1064	40.1	RH
Zrd_Ni_@96	9.30279	0.114455	0.088543	0.114455	4358590	0.0749961	114.874	0.00236721	33.4296	1.46718	14.014	0.282315	23.7322	0.282294	-7.1238	0.840089	1.66113	459.4	6.13	RH
Zrd_Ni_@97	3.47884	0.098726	0.088543	0.098726	4351280	0.0233261	19.2769	0.000841962	5.22593	1.46717	16.6713	0.281308	21.5567	0.28127	0.138519	0.766416	2.82876	2368	3.49	RH
Zrd_Ni_@98	5.47334	0.0936583	0.088543	0.0936583	4351600	0.0268938	22.237	0.000860232	5.33989	1.46717	13.401	0.282474	16.4438	0.282467	-1.58644	0.582056	1.33687	433.8	5.67	RH
Zrd_Ni_@99	6.47059	0.114352	0.088543	0.114352	4360030	0.0318141	36.1956	0.00105982	10.396	1.4671	8.21914	0.281735	31.5225	0.281705	-4.00884	1.11854	2.36283	1520	11.1	RH
Zrd_Ni_@100	5.86726	0.0730771	0.088543	0.088543	4362100	0.0315049	26.5198	0.000960913	6.17978	1.46715	16.9356	0.282242	17.2113	0.282225	1.28822	0.609921	1.5975	942.5	46.4	RH
Zrd_Ni_@101	6.42572	0.0746785	0.088543	0.088543	4359600	0.0123068	9.89201	0.000385041	2.3184	1.46714	17.9638	0.282195	17.4442	0.282187	1.81774	0.618293	1.63613	1025	24.3	RH
Zrd_Ni_@102	7.49278	0.0642378	0.088543	0.088543	4375850	0.0527774	42.6063	0.00176462	10.7952	1.46721	12.6245	0.282036	22.1598	0.281987	4.57921	0.786205	1.83904	1458	6.43	RH
Zrd_Ni_@103	5.31378	0.146887	0.088543	0.146887	4361280	0.0185119	47.9898	0.000592134	14.3735	1.4672	16.1702	0.281137	23.9396	0.281107	1.20218	0.851723	3.00996	2662	15.2	RH
Zrd_Ni_@104	5.77252	0.0996307	0.088543	0.0996307	4372680	0.0117196	9.89052	0.000390796	2.5193	1.46718	14.0189	0.281107	19.4704	0.281087	1.6823	0.692798	3.02421	2712	3.55	RH
Zrd_Ni_@105	5.76254	0.121127	0.088543	0.121127	4382240	0.0315356	30.6972	0.00110029	9.36771	1.46711	10.6281	0.281963	34.3883	0.281933	1.99068	1.21998	1.95742	1428	19.1	RH
Zrd_Ni_@106	6.59393	0.0656475	0.088543	0.088543	4371860	0.0388573	40.4021	0.00131242	12.4921	1.46723	8.58002	0.282113	28.8645	0.282088	-1.45444	1.0231	1.82526	1036	191	RH
Zrd_Ni_@107	6.7485	0.0659465	0.088543	0.088543	4379570	0.0262908	23.4217	0.000824183	6.06739	1.46719	13.372	0.282065	18.6405	0.282045	3.44085	0.661134	1.78714	1318	32.6	RH
Zrd_Ni_@108	7.0776	0.121448	0.088543	0.121448	4364170	0.0285928	24.3451	0.000902264	6.19649	1.46718	16.9859	0.282143	19.3679	0.282126	-0.889835	0.686438	1.76546	1001	15.6	RH
Zrd_Ni_@109	8.12973	0.0641413	0.088543	0.088543	4389050	0.0282526	23.8121	0.000917784	6.2489	1.46716	17.0323	0.281828	18.825	0.2818	1.688	0.668139	2.13233	1621	8.88	RH
Zrd_Ni_@110	6.48921	0.114524	0.088543	0.114524	4378910	0.0170466	24.7738	0.000519559	6.83303	1.46716	16.9792	0.282185	17.1802	0.282175	1.84547	0.60896	1.65103	1045	16.7	RH
Zrd_Ni_@111	7.1873	0.0734791	0.088543	0.088543	4389890	0.018175	15.7194	0.000568665	4.09629	1.46724	11.0024	0.281552	23.6263	0.281532	-0.617732	0.839156	2.5165	1935	5.58	RH
Zrd_Ni_@112	6.86818	0.0913517	0.088543	0.0913517	4389590	0.0234603	18.9303	0.000746143	4.55386	1.46717	14.2737	0.28225	21.0745	0.282235	3.98731	0.747	1.53364	1046	11.9	RH
Zrd_Ni_@113	5.60164	0.107547	0.088543	0.107547	4392830	0.0236661	29.9244	0.000879372	8.78578	1.46718	8.10423	0.282723	24.8002	0.282723	-2.18023	0.877001	1.01245	1.11	0.241	LS
Zrd_Ni_@114	7.9951	0.0898447	0.088543	0.0898447	4393490	0.0433321	37.1196	0.00150348	9.41102	1.46718	11.7651	0.281898	23.4245	0.281852	3.26566	0.831365	2.03623	1610	7.48	RH
Zrd_Ni_@115	5.44706	0.0860225	0.088543	0.088543	4386490	0.0497679	48.6135	0.00139766	10.3475	1.46717	12.5002	0.281704	23.1987	0.281658	-0.42378	0.823614	2.35355	1749	5.17	RH
Zrd_Ni_@116	7.06265	0.0861668	0.088543	0.088543	4407100	0.0347787	40.8219	0.00110024	12.7662	1.46714	19.0005	0.281631	19.7174	0.281594	-2.13182	0.700056	2.46715	1773	25.8	RH
Zrd_Ni_@117	6.8981	0.0837206	0.088543	0.088543	4401130	0.03619	30.0161	0.00109919	7.10749	1.4672	17.7507	0.282155	16.0641	0.282131	2.24054	0.569512	1.69989	1131	14.7	RH
Zrd_Ni_@118	5.90082	0.0970029	0.088543	0.0970029	4401170	0.0185655	28.8946	0.000699835	11.2107	1.46725	9.03708	0.281229	37.8428	0.281195	1.63457	1.34601	2.89231	2547	7.3	RH
Zrd_Ni_@119	5.66147	0.0732098	0.088543	0.088543	4411240	0.0248201	36.3692	0.000777286	9.17402	1.46715	16.2001	0.282197	17.6699	0.282184	-0.510909	0.626153	1.68412	927.4	16.3	RH
Zrd_Ni_@120	5.73128	0.0945482	0.088543	0.0945482	4404680	0.0191696	19.9771	0.000636012	4.70719	1.46716	16.6617	0.281961	20.0321	0.281943	3.81897	0.710773	1.90977	1493	7.68	RH
Zrd_Br_@64	6.50054	0.0766107	0.088543	0.088543	4273040	0.0144689	11.9265	0.000426907	2.76149	1.46716	15.3374	0.282466	20.1106	0.282464	-3.89962	0.711695	1.38283	335.7	4.73	RH
Zrd_Br_@65	10.8036	0.109829	0.088543	0.109829	4297450	0.00253447	2.06792	6.36976e-05	0.389078	1.46715	19.0907	0.282387	16.4527	0.282387	-6.42672	0.582256	1.52815	344.3	4.21	RH
Zrd_Br_@66	6.61523	0.0910214	0.088543	0.0910214	4290400	0.00360459	3.00514	9.39534e-05	0.618764	1.46715	17.5669	0.282366	17.0926	0.282365	-2.71621	0.605173	1.48975	544.1	22.5	RH
Zrd_Br_@67	5.97699	0.0895287	0.088543	0.0895287	4299400	0.00919176	7.61185	0.000279233	1.74607	1.46716	13.2237	0.282109	21.3408	0.282104	-2.68023	0.756283	1.82664	955.8	82.3	RH
Zrd_Br_@68	7.5277	0.108074	0.088543	0.108074	4301210	0.0245839	19.8556	0.00071398	4.43244	1.46712	15.3999	0.282402	16.6563	0.282393	0.599344	0.589863	1.39324	648.1	47.7	RH
Zrd_Br_@69	5.63294	0.0984198	0.088543	0.0984198	4297240	0.0139925	25.8758	0.000459469	8.1485	1.46715	21.7065	0.281175	18.7888	0.281153	-1.41483	0.668181	3.00574	2480	26.5	RH
Zrd_Br_@70	5.05953	0.0648139	0.088543	0.088543	4298300	0.00820812	6.84642	0.000306443	1.92316	1.46717	21.1135	0.280947	16.9492	0.280931	-5.71078	0.602975	3.3665	2633	4.79	RH
Zrd_Br_@71	5.74264	0.0840158	0.088543	0.088543	4296670	0.0137213	11.1844	0.000446845	2.82242	1.46716	18.3513	0.281988	15.4807	0.281979	-3.82844	0.548792	2.00979	1102	30.1	RH
Zrd_Br_@72	5.88724	0.115268	0.088543	0.115268	4305750	0.0224368	18.4486	0.000703844	4.53273	1.46715	14.8077	0.282011	18.9522	0.281998	-6.34839	0.671643	2.03157	960.7	25.8	RH
Zrd_Br_@73	5.63793	0.115949	0.088543	0.115949	4303380	0.0190421	16.5104	0.000575804	3.86903	1.46709	13.4969	0.282138	15.1118	0.282128	-2.32135	0.53551	1.78943	934.5	51.4	RH
Zrd_Br_@74	4.64568	0.131984	0.088543	0.131984	4313850	0.0220195	17.9226	0.000675265	4.13128	1.46715	14.5549	0.282488	18.8247	0.282481	2.8313	0.666595	1.23807	609	12.6	RH
Zrd_Br_@75	7.22354	0.110152	0.088543	0.110152	4327820	0.00163764	1.35473	4.4608e-05	0.303484	1.46715	15.7884	0.281024	18.2857	0.281024	-48.4507	0.64753	4.00643	623.1	23.6	RH
Zrd_Br_@76	11.1178	0.0946391	0.088543	0.0946391	4356550	0.00144399	1.48074	3.40851e-05	0.286371	1.46713	20.7101	0.282444	16.152	0.282443	0.26589	0.571881	1.33385	553.7	35.6	RH
Zrd_Br_@77	8.84905	0.101094	0.088543	0.101094	4345260	0.0309038	26.1852	0.000834798	5.33467	1.46716	16.0704	0.282403	15.7343	0.282394	-1.90604	0.557069	1.43714	534.2	41.5	RH
*measured for the proposal
n.d.= not determined
Bouvier, A., Vervoort, J.D., Patchett, P.J., 2008. The Lu–Hf and Sm–Nd isotopic composition of CHUR: constraints from unequilibrated chondrites and implications for the bulk composition of terrestrial planets. Earth and Planetary Science Letters, 273(1-2): 48-57.
